# Supplementary material for: Inherent impurities in 3D-printed electrodes are responsible for catalysis towards water splitting
Source: Royal Society of Chemistry journal article supplement (doi:10.1039/c9ta11949c), 2020-01-01
Supplement: c9ta11949c1.pdf [file c9ta11949c1.pdf]

## Supplementary Information

# Inherent Impurities in 3D-Printed Electrodes are Responsible for Catalysis towards Water Splitting

*Michelle P. Browne<sup>a1</sup>, Veronika Urbanova<sup>a1</sup>, Jan Plutnar<sup>a</sup>, Filip Novotný<sup>a</sup> and Martin Pumera<sup>abcd\*</sup>*

<sup>a</sup>Center for Advanced Functional Nanorobots, Department of Inorganic Chemistry, University of Chemistry and Technology Prague, Technická 5, 166 28 Prague 6, Czech Republic

<sup>b</sup>Department of Chemical and Biomolecular Engineering, Yonsei University, 50 Yonsei-ro, Seodaemun-gu, Seoul 03722, Korea

<sup>c</sup>Department of Medical Research, China Medical University Hospital, China Medical University, No. 91 Hsueh-Shih Road, Taichung, Taiwan

<sup>d</sup>Central European Institute of Technology, Brno University of Technology, Purkyňova 656/123, Brno, CZ-616 00, Czech Republic

<sup>1</sup>Joint first author

E-mail: [pumera.research@gmail.com](mailto:pumera.research@gmail.com)

**Keywords:** 3D-printing, impurity, electrocatalysis, photoelectrochemical water splitting

## Experimental Section

### 3D-printing of electrodes

The electrode design was created on an online computer aided design (CAD) software called 'Tinkercad.com'. Once the electrode design was completed, the design was converted to a .STL file and then converted to a .gcode file in the PRUSA slicer. The 3D-printing of the electrode was carried out using a commercial conductive graphene/PLA filament (BlackMagic3D) in an Original

Prusai3MK3 3D-printer (PRUSA). For the printing, the nozzle and the bed temperatures were 220 °C and 55 °C, respectively. The diameter of the nozzle opening was 0.6 mm.

*DMF*

#### **Treatment of the bare 3D-printed electrode**

The 3D-printed electrodes were immersed in DMF for 10 minutes. After the electrodes were rinsed with ethanol and then allowed to dry overnight at room temperature.

#### **Thermal treatment of the bare 3D-printed electrode**

The 3D-printed electrode was inserted into a vacuum chamber filled with nitrogen (500 Pa) and gradually heated to 350 °C (at a rate of 5 °C/min) and held at this temperature for 3 hours.

*Materials characterisation parameters:* Inductively coupled plasma emission spectroscopy was carried out using a Spectro ARCOS spectrometer (SPECTRO Analytical Instruments, Germany) in a Paschen-Runge configuration with a Rowland circle polychromator. The measurements of the various elements were conducted simultaneously with 32 charge coupled device (CCD) detectors in the spectral range of 130-770 nm. Scanning electron microscopy (SEM)/energy dispersive X-ray (EDX) spectroscopy was conducted on a Tescan Maia3 Triglav high-resolution microscope (SEM) coupled with a XMAX 150 EDX detector. The accelerating voltage was 20 kV and the working distance was 5 mm. X-Ray Photoelectron spectroscopy (XPS) was carried out on a SPECS XPS spectrometer equipped with an Al (1486.7 eV) XR 50 MF X-ray source. The pass energy for the survey and high-resolution core level scans were 50 eV and 30 eV, respectively. The XPS data was fitted using XPS Casa software.

## **Electrochemical measurements**

All electrochemical measurements were carried out in a three electrode cell consisting of working, reference and counter electrodes. The reference electrode for the HER and PEC measurements was an Ag/AgCl electrode and the counter electrode was a graphite rod. The electrolytes used for the HER and PEC measurements were 0.5 M H<sub>2</sub>SO<sub>4</sub> and 1M NaOH, respectively. For the HER measurements, the scan rate for the linear sweep voltammetry was 5 mVs<sup>-1</sup>. For the PEC water oxidation measurements, a homemade LED set-up consisting of three 390-400 nm LEDs was used to illuminate the 3D-printed electrodes. The PEC measurements were carried out at a constant potential of 1.23 V vs. RHE.
